# Supplementary material
Source: PubMed Central journal article supplement (PMC6754177)
Supplement: NIHMS1538427-supplement-8.pdf [file NIHMS1538427-supplement-8.pdf]

**Supplementary Table 1. Virion proteins of phage JBD30 detect by mass spectrometry, Related to Figure 7A**

| <b>JBD30 ORF</b> | <b>Accession ID</b> | <b>Protein Length<br/>(amino acids)</b> | <b>Function</b>                     |
|------------------|---------------------|-----------------------------------------|-------------------------------------|
| 32               | YP_007392339.1      | 526                                     | portal protein                      |
| 33               | YP_007392340.1      | 428                                     | homolog of phage Mu gpF             |
| 37               | YP_007392344.1      | 365                                     | protease/scaffold                   |
| 38               | YP_007392345.1      | 304                                     | major head                          |
| 41               | YP_007392348.1      | 138                                     | head-tail joining                   |
| 42               | YP_007392349.1      | 157                                     | tail terminator                     |
| 44               | YP_007392351.1      | 256                                     | tail tube                           |
| 46               | YP_007392353.1      | 1158                                    | tape measure                        |
| 47               | YP_007392354.1      | 318                                     | putative tail protein               |
| 48               | YP_007392355.1      | 307                                     | putative tail protein               |
| 49               | YP_007392356.1      | 567                                     | tail protein; phage lambda gpM-like |
| 50               | YP_007392357.1      | 273                                     | tail protein; phage lambda gpL-like |
| 53               | YP_007392360.1      | 735                                     | central fiber                       |
| 54               | YP_007392361.1      | 382                                     | putative pilus binding protein      |

**Supplementary Table 2. List of genomes and anti-CRISPR protein identifiers used in Figure 1**

| <b>Source</b>                            | <b>Genome ID</b>  | <b>Anti-CRISPR ID</b>             |
|------------------------------------------|-------------------|-----------------------------------|
| <i>Pseudomonas</i> phage JBD30           | NC_020198.1       | YP_007392342.1                    |
| <i>Alcanivorax</i> sp. KX64203           | NZ_LVIC01000002.1 | WP_063139756.1                    |
| <i>Pectobacterium</i> phage ZF40         | NC_019522.1       | YP_007006940.1                    |
| <i>Escherichia coli</i> SE11             | NC_011413         | WP_000765122.1                    |
| <i>Neisseria meningitidis</i> 23231      | NZ_OALB01000002.1 | WP_042743676.1;<br>WP_042743678.1 |
| <i>Listeria monocytogenes</i> J0161      | NC_017545.1       | WP_003722517.1;<br>WP_003722518.1 |
| <i>Streptococcus</i> phage Sfi21         | NC_000872.1       | NP_049988.1                       |
| <i>Streptococcus</i> phage D1811         | MH000604.1        | AVO22749.1                        |
| <i>Sulfolobus islandicus</i> rudivirus 3 | NC_030884.1       | YP_009272954.1                    |

**Supplementary Table 3. List of genomes and Aca protein identifiers used in Supplementary Figures 6 and 7**

| <b>Source</b>                    | <b>Genome ID</b>  | <b>Aca ID</b>  |
|----------------------------------|-------------------|----------------|
| <i>Pectobacterium</i> phage ZF40 | NC_019522.1       | YP_007006939.1 |
| <i>Vibrio parahaemolyticus</i>   | NZ_JPKT01000003.1 | WP_080285139.1 |
| <i>Vibrio cyclitrophicus</i>     | KP795522.1        | AKN37111.1     |
| <i>Phaseolibacter flectens</i>   | NZ_JAEE01000001.1 | WP_036985669.1 |
| <i>Serratia marcescens</i>       | NZ_CP013046.2     | WP_060559942.1 |
| <i>Proteus penneri</i>           | GG661994.1        | EEG86165.1     |
| <i>Shewanella xiamenensis</i>    | JGVI01000034.1    | KEK29120.1     |
| <i>Oceanimonas smirnovii</i>     | NZ_KB908455.1     | WP_019933869.1 |
| <i>Brackiella oedipodis</i>      | NZ_KK211205.1     | WP_028357637.1 |
| <i>Nme</i> NmSL13x2              | NZ_NGAT01000003.1 | WP_002212356.1 |
| <i>Nme</i> 22472                 | NZ_OAFV01000002.1 | WP_002255676.1 |
| <i>Nme</i> M40030                | NZ_QQEW01000023.1 | WP_118803841.1 |
| <i>Nme</i> 2842STDY5881035       | NZ_FERW01000005.1 | WP_042743680.1 |
| <i>Nme</i> NM80179               | NZ_ALXV01000004.1 | WP_002231710.1 |
| <i>Nme</i> 2842STDY5881013       | NZ_FERN01000021.1 | WP_061695140.1 |
| <i>Nme</i> WUE2121               | NZ_CP012394.1     | WP_061384811.1 |

**Supplementary Table 4. Oligonucleotides used in this study, Related to STAR Methos**

| <b>Purpose</b>                                                        | <b>Sequence (5'-3')</b>                |
|-----------------------------------------------------------------------|----------------------------------------|
| Cloning of JBD30 anti-CRISPR locus into pBTK30 transposon             | F: GGGCCCGTCGACTGGCCACTTTCGGACAAG      |
|                                                                       | R: CCCGGGGTCGACTCACGCAGATGGCGGGTTCGT   |
| Generation of RT-qPCR standard for gene <i>A</i>                      | F: TGGTTCAGCCCTCAACAACCT               |
|                                                                       | R: TCTTGAGCATGGCGAGCA                  |
| RT-qPCR of gene <i>A</i>                                              | F: GCCTCGGTTCAACAGTACGA                |
|                                                                       | R: AACGTGGTACTCCATCGCTTT               |
| Generation of RT-qPCR standard for gene <i>G</i>                      | F: AGTTCGCCTTTATGGACGAG                |
|                                                                       | R: ATTTCCGGCTCAAGGCTGTTA               |
| RT-qPCR of gene <i>G</i>                                              | F: CGGGTCCAACCTTGGTCTATG               |
|                                                                       | R: TTTCGTCGAACGGCAGATA                 |
| Generation of RT-qPCR standard for <i>acrIF1</i>                      | F: ATGAAGTTCATCAAATACCTC               |
|                                                                       | R: TCAGGGGTTTTACGCCGGG                 |
| RT-qPCR of <i>acrIF1</i>                                              | F: AATACCTCAGCACCGCTCAC                |
|                                                                       | R: TTGCCGTTTACGACGTTCTC                |
| Generation of RT-qPCR standard for <i>acaI</i>                        | F: ATGAGATTTCCCGGCGTGAA                |
|                                                                       | R: TCACGCAGATGGCGGGTTCGT               |
| RT-qPCR of <i>acaI</i>                                                | F: TCAAGAAAGCCGGCATCA                  |
|                                                                       | R: TCCTTGATGTCCTCGCTCAG                |
| Generation of RT-qPCR standard for gene <i>37</i> (protease/scaffold) | F: GAAAAGAACCGCCTACTCGTT               |
|                                                                       | R: TGGCTTTCAGGAGTTCATCC                |
| RT-qPCR of gene <i>37</i>                                             | F: ATGAGCACCAGACCCTCAAG                |
|                                                                       | R: GGGCTGTGTATTCGACACG                 |
| Generation of RT-qPCR standard for <i>clpX</i>                        | F: CTGCAAGAGTTTCTGGATGATG              |
|                                                                       | R: CTTTATCTGCGACGAGTGTGTC              |
| RT-qPCR of <i>clpX</i>                                                | F: CGCTTGTAGTGGTTGTATACCG              |
|                                                                       | R: AAAGTAGTGGGCACAAACTTCC              |
| Generation of RT-qPCR standard for <i>rpoD</i>                        | F: GAGATGCGGTTGAGCTTGTT                |
|                                                                       | R: GTCGACAGCGTCCTGAAGAG                |
| RT-qPCR of <i>rpoD</i>                                                | F: GGGCGAAGAAGGAAATGGTC                |
|                                                                       | R: CAGGTGGCGTAGGTAGAGAA                |
| Cloning of anti-CRISPR promoter from JBD30                            | F: CCCGGGCCCCATGGTGGCCACTTTCGGACAAG    |
|                                                                       | R: CCCGGGAAGCTTGGTTTGAATCCTTGTTGGCGCC  |
| Generation anti-CRISPR promoter deletion recombination cassette       | F: AGCCGAAATCGGTAGAACGGCGAGGCGCCAACAAG |
|                                                                       | R: CTACCGATTTCCGGCTCAAG                |
| Cloning <i>AcaI</i>                                                   | F: CCCGGGCCATGGCCAGATTTCCCGGCGTGAA     |
|                                                                       | R: CCCGGGAAGCTTTCACGCAGATGGCGGGTTCGT   |

| <b>Purpose</b>                                            | <b>Sequence (5'-3')</b>                                                                                                                         |
|-----------------------------------------------------------|-------------------------------------------------------------------------------------------------------------------------------------------------|
| Wild-type anti-CRISPR promoter substrate for EMSA         | sense: ACAAGCGGCACACTGTGCCTATTGCGAATTAGG<br>CACAATGTGCCTAATCTAACG<br>anti-sense: GGTTAGATTAGGCACATTGTGCCTAATTTCGC<br>AATAGGCACAGTGTGCCGCTTGT    |
| IR1 mutant anti-CRISPR promoter substrate for EMSA        | sense: ACAAGCGTCGTACTIONGTGCCTATTGCGAATTAGG<br>CACAATGTGCCTAATCTAACG<br>anti-sense: CGTTAGATTAGGCACATTGTGCCTAATTTCGC<br>AATAGGCACAGTACGACGCTTGT |
| IR2 mutant anti-CRISPR promoter substrate for EMSA        | sense: ACAAGCGGCACACTGTGCCTATTGCGAGCTAGT<br>CCCAATGTGCCTAATCTAACG<br>anti-sense: CGTTAGATTAGGCACATTGGGACTAGCTCGC<br>AATAGGCACAGTGTGCCGCTTGT     |
| IR1+IR2 mutant anti-CRISPR promoter substrate for EMSA    | sense: ACAAGCGTCGTACTIONGTGCCTATTGCGAGCTAGT<br>CCCAATGTGCCTAATCTAACG<br>anti-sense: CGTTAGATTAGGCACATTGGGACTAGCTCGC<br>AATAGGCACAGTACGACGCTTGT  |
| Generation of IR1 mutations in anti-CRISPR promoter       | sense: GGCCACTTTCGGACAAGCGTCGTACTIONGTGCCTAT<br>TGCGAATT<br>anti-sense: AATTCGCAATAGGCACAGTACGACGCTTGT<br>CGAAAGTGGCC                           |
| Generation of IR2 mutations in anti-CRISPR promoter       | sense: TGACGTTAGATTAGGCACATTGGGACTGCTTCG<br>CAATAGGCACAGTGTGCC<br>anti-sense: GGCACACTGTGCCTATTGCGAAGCAGTCCCA<br>ATGTGCCTAATCTAACGTCA           |
| Generation of R33A Aca1 mutant                            | sense: TCGGCTGCGCGCGCCTGGCTGATGCC<br>anti-sense: GGCATCAGCCAGGCGCGCGCAGCCGA                                                                     |
| Generation of R34A Aca1 mutant                            | sense: CAGCTCGGCTGCGGCCCGCTGGCTGATG<br>anti-sense: CATCAGCCAGCGGGCCGCGCAGCCGAGCTG                                                               |
| Generation of R33A/R34A Aca1 mutant                       | sense: CAGCTCGGCTGCGGCCCGCCTGGCTGATGCCG<br>anti-sense: CGGCATCAGCCAGGCGGCCGCGCAGCCGAGCTG                                                        |
| Generation of R44A Aca1 mutant                            | sense: GTAATAGCGCATCACCGCGTCACTIONGAGGCCGAGC<br>anti-sense: GCTCGGCCTCAGTGACGCGGTGATGCGCTA<br>TTAC                                              |
| Amplification of <i>rrnB</i> T1 terminator                | F: ACGACCCGCCATCTGCGTGAAGGGACTIONGCCAGGC<br>ATC<br>R: TTTGCGGGCGGATCAGGTGACGTTCACTIONGACAAACA<br>ACAG                                           |
| Generation of terminator insertion recombination cassette | F: TCACCTGATCCGCCCGCA<br>R: TCACGCAGATGGCGGGTC                                                                                                  |
| Cloning of Aca2                                           | F: TAGTTGCGGCCGCAAAATGGATGAATIONGGTCAAGAAT<br>TAAAAAAG<br>R: GCGGCCGCGAGGCAAAAGGATATTAGATTAAATIONCCGCG<br>TGAC                                  |

| <b>Purpose</b>                                          | <b>Sequence (5'-3')</b>                               |
|---------------------------------------------------------|-------------------------------------------------------|
| Cloning of <i>Aca3</i>                                  | F: TAGTTGCGGCCGCAAATGGATGAAGAAATTTGAAG<br>CCC         |
|                                                         | R: GCGGCCGCAGGCAAAGGATATTATTTAATGAATCC<br>AAAAGTTTTTG |
| Amplification of pCM-Str<br>for <i>Aca</i> cloning      | F: TATCCTTTGCCTGCGGCC                                 |
|                                                         | R: CCATTTTGCGGCCGCAAC                                 |
| Cloning of <i>aca2</i><br>associated upstream<br>region | F: CCCGGGCCATGGAGCCTCACCTCCGGCG                       |
|                                                         | R: CCCGGGAAGCTTCTCGAACCGATGAATAAATTATAT<br>GT         |
| Cloning of <i>aca3</i><br>associated upstream<br>region | F: CCCGGGCCATGGAATTGAATCCGCAATGGTGAAA                 |
|                                                         | R: CCCGGGAAGCTTTTTGAAATCCTTTCGTTTATCCTTG              |

**Supplementary Table 5. Plasmids used in this study, Related to STAR Methods**

| <b>Plasmid ID</b> | <b>Purpose</b>                                                  | <b>Backbone</b> |
|-------------------|-----------------------------------------------------------------|-----------------|
| pES102            | Overexpression of JBD44-targeting crRNA in <i>P. aeruginosa</i> | pHERD30T        |
| pSY100            | Overexpression of JBD30 Aca1 in <i>P. aeruginosa</i>            | pHERD30T        |
| pSY115            | Overexpression of R33A Aca1 mutant in <i>P. aeruginosa</i>      | pHERD30T        |
| pSY116            | Overexpression of R34A Aca1 mutant in <i>P. aeruginosa</i>      | pHERD30T        |
| pSY117            | Overexpression of R33A/34A Aca1 mutant in <i>P. aeruginosa</i>  | pHERD30T        |
| pSY118            | Overexpression of R44A Aca1 mutant in <i>P. aeruginosa</i>      | pHERD30T        |
| pSY099            | Overexpression of AcrIF1 in <i>P. aeruginosa</i>                | pHERD30T        |
| pSY107            | Generation of JBD30 $\Delta$ <i>Pacr</i>                        | pHERD20T        |
| pSY108            | Generation of JBD30 IR1 mut                                     | pHERD20T        |
| pSY109            | Generation of JBD30 IR2 mut                                     | pHERD20T        |
| pSY110            | Generation of JBD30 IR1+IR2 mut                                 | pHERD20T        |
| pSY119            | Generation of JBD30 <i>aca</i> <sup>R33A</sup>                  | pHERD20T        |
| pSY120            | Generation of JBD30 <i>aca</i> <sup>R34A</sup>                  | pHERD20T        |
| pSY121            | Generation of JBD30 <i>aca</i> <sup>R33A/R34A</sup>             | pHERD20T        |
| pSY122            | Generation of JBD30 <i>aca</i> <sup>R44A</sup>                  | pHERD20T        |
| pSY182            | Generation of JBD30 <i>aca</i> <sup>R44A</sup> IR1+IR2 mut      | pHERD20T        |
| pSY183            | Generation of JBD30+ <i>rrnB</i> T1                             | pHERD20T        |
| pSY184            | Generation of JBD30 <i>aca</i> <sup>R44A</sup> + <i>rrnB</i> T1 | pHERD20T        |
| pSY105            | Encodes anti-CRISPR locus carrying transposon                   | pBTK30          |
| pSY101            | Determining anti-CRISPR promoter region activity                | pQF50           |
| pSY102            | Determining IR1 mutant promoter activity                        | pQF50           |
| pSY103            | Determining IR2 mutant promoter activity                        | pQF50           |
| pSY104            | Determining IR1+IR2 mutant promoter activity                    | pQF50           |
| pSY138            | Determining <i>aca2</i> -associated promoter activity           | pQF50           |
| pSY139            | Determining <i>aca3</i> -associated promoter activity           | pQF50           |
| pSY123            | Expression and purification of JBD30 Aca1                       | p15TV-L         |
| pSY124            | Expression and purification of R33A Aca1 mutant                 | p15TV-L         |
| pSY125            | Expression and purification of R34A Aca1 mutant                 | p15TV-L         |
| pSY126            | Expression and purification R33A/34A Aca1 mutant                | p15TV-L         |
| pSY127            | Expression and purification of R44A Aca1 mutant                 | p15TV-L         |
| pSY146            | Constitutive expression of <i>aca1</i> in <i>E. coli</i>        | pCM-Str         |
| pSY144            | Constitutive expression of <i>aca2</i> in <i>E. coli</i>        | pCM-Str         |





**Supplementary Table 6. Sequences for cloning of *aca2*, *aca3*, and associated promoter regions, Related to STAR Methods**

| Description                                                                         | Reference Sequence | Sequence                                                                                                                                                                                                                                                                                                                                                                                                                                                                                                                                                                                                                                                                                                                                                                                                                                                                                                                                                        |
|-------------------------------------------------------------------------------------|--------------------|-----------------------------------------------------------------------------------------------------------------------------------------------------------------------------------------------------------------------------------------------------------------------------------------------------------------------------------------------------------------------------------------------------------------------------------------------------------------------------------------------------------------------------------------------------------------------------------------------------------------------------------------------------------------------------------------------------------------------------------------------------------------------------------------------------------------------------------------------------------------------------------------------------------------------------------------------------------------|
| Anti-CRISPR locus phage ZF40                                                        | NC_019522.1        | <p>AGCCTCACCTCCGGCGTTGCCGTGGCGCTGTG<br/> TGATTTACAGGAAATAAAAAGGCCACGAATG<br/> CGGCCTTAGCGATTAAAAAATATGAAATGCCT<br/> TGCTTGTTTCGCGATTGCGAACATATAATTTATT<br/> CATCGGTTTCGAGATGGCTCGAATCGCTCCTAA<br/> CGAGGATTCCACAATGTCTACTGCTTACATCA<br/> TCTTTAACTCATCCGTCGCGGCCGTAGTTGATA<br/> CTGAGATCGCTAATGGCGCTAATGTACATTC<br/> TCAACAGTGACCGTTAAGAAGAAATTAACGC<br/> GAACCGTGATTTCAATCTGGTTAACGCTCAGA<br/> ACGGGAAAATCTCACGCGCAAACGCTGGGG<br/> AAACGAGGCGTCAAAATGTGAGTATTTTGGCC<br/> GAGAAATAAACCCAACCGAGTTTTTTCATCAA<br/> TAATGTGGTCAAAATGACAAACAAGAACTTC<br/> AGGCAATCAGAAAATGTTAATGCTGGATGTA<br/> TCAGAAGCGGCTGAACACATTGGCCGCGTTTC<br/> CGCCCGGAGTTGGCAATATTGGGAGTCTGGAC<br/> GCTCTGCTGTTCTGATGATGTTGAGCAGGAA<br/> ATGTTGGATTTAGCGTCAGTCAGGATAGAAAT<br/> GATGTCCGCTATAGACAAGCGTCTCGCCGATG<br/> GCGAACGTCCTAAATTACGTTTTTATAACAAG<br/> TTGGATGAATACCTGGCTGACAACCCCGATCA<br/> CAATGTGATCGGGTGGCGTCTGAGCCAGTCTG<br/> TTGCCGCACTCTATTACACTGAGGGTCACGCG<br/> GATTTAATCTAA</p> |
| Anti-CRISPR promoter region and <i>aca3</i> gene from <i>Neisseria meningitidis</i> | NZ_FERW010000 05.1 | <p>TCCCAATTACCTGTTTGAAGCAGTATTTGTTTC<br/> TCAAATGACCAATTTTTTAACCAAAGGCCGCTA<br/> ATGTGGCCGTTTTTTTTTGTTCATACTCTTCT<br/> AATTTAGGGTCTCTGCCTCCAAGCTCCCGGTCT<br/> CGCCGCCGACGGCTCGGGAGCAGGGCATAGC<br/> CATAAAAGCTTACATTGTGTGCTAGACTATAT<br/> CAAAC TACAAC TACGAAAGGAAATCCGAACA<br/> CTATGAATAAACTTATAAAATTGGAAAAAAT<br/> GCCGGGTATGATGGCTGCGGTCTTTGTCTTGC<br/> GGCCATTTCTGAAAATGAAGCTATCAAAGTTA<br/> AGTATTTGCGGACATTTGTCCTGATTACGAT<br/> GGCGATGATAAAGCTGAGGATTGGCTGAGAT<br/> GGGGAACGGACAGCCGCGTCAAAGCAGCCGC<br/> TCTTGAATGGAGCAGTACGCATATACGTCGG<br/> TTGGTATGGCCTCATGTTGGGAGTTTGTGAA</p>                                                                                                                                                                                                                                                                                                                                                                        |

---

CTATGAAGAAATTTGAAGCCCCTGAAATTGGC  
TATACACCTGCCAATCTTAAAGCACTGAGAAA  
ACAATTTGGGCTTACACAAGCTCAGGTAGCAG  
AAATTA CTGGTACAAAAACCGGATACAGCGTC  
CGCAGGTGGGAAGCAGCAATTGATGCCAAAA  
ATCGCGCGGATATGCCGCTCGTAAAATGGCAA  
AAACTTTTGGATTCATTAATAATGA

---
